# Supplementary material for: Blackcurrant (Ribes nigrum) Extract Prevents Dyslipidemia and Hepatic Steatosis in Ovariectomized Rats
Source: Nutrients. 2020 May 25;12(5):1541. doi: 10.3390/nu12051541 (PMC7284623; doi:10.3390/nu12051541)
Supplement: Supplementary file 1 [file nutrients-12-01541-s001.pdf]

**Supplementary Table S1.** Serum glucose and liver injury marker levels of OVX Ctrl and sham (sham) groups fed with regular diet and OVX rats treated with BCE diet (OVX BCE) for 3 months.

|                 | OVX Ctrl     | OVX BCE    | sham         |
|-----------------|--------------|------------|--------------|
| Glucose (mg/dL) | 173.4 ± 55.9 | 165 ± 48.6 | 140.6 ± 37.9 |
| AST (U/L)       | 55 ± 28      | 36 ± 14    | 29 ± 16      |
| ALT (U/L)       | 18 ± 8       | 14 ± 5     | 14 ± 5       |
| γ-GT (U/L)      | 13 ± 7       | 14 ± 11    | 12 ± 7       |

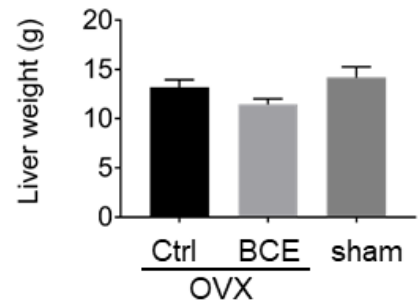

**Supplementary Figure S1. Effect of BCE on rat liver weight.** OVX rats treated with 3% BCE for 3 months (OVX BCE, n=9), OVX rats without BCE treatment (OVX Ctrl, n=10), and sham surgery rats without BCE treatment (sham, n=9).
